# Supplementary material
Source: Springer Nature journal article supplement (https://www.springermedizin.de/resource/supplementary/13045_2010_140_MOESM9_ESM.pdf/9660844)
Supplement: MOESM9 [file 9660844]

imatinib-sensitive

imatinib-resistant

JURL-MK2

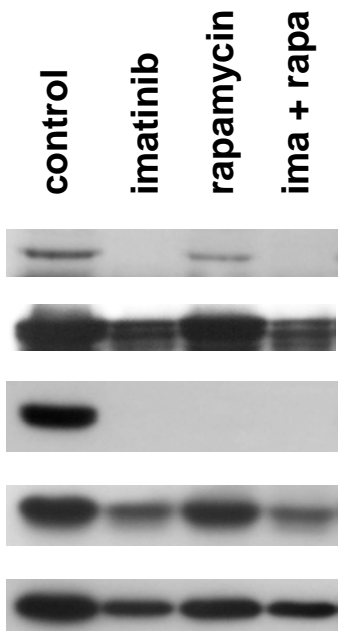

SUP-B15

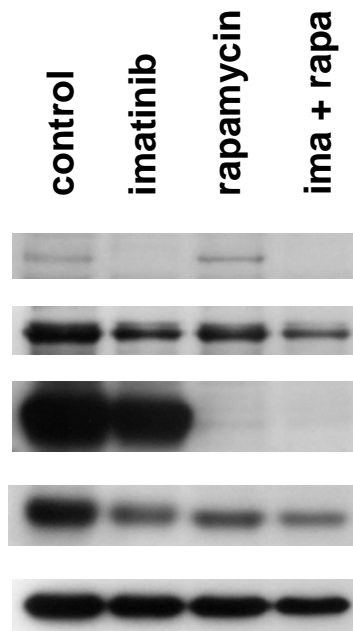

pSTAT5

STAT5

pRPS6

RPS6

GAPDH

EM-2

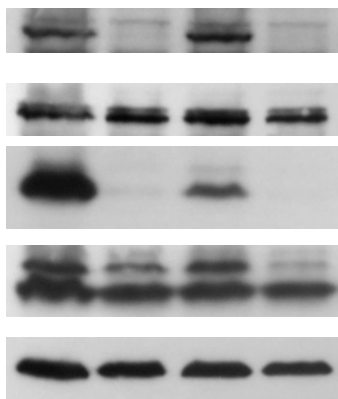

NALM-1

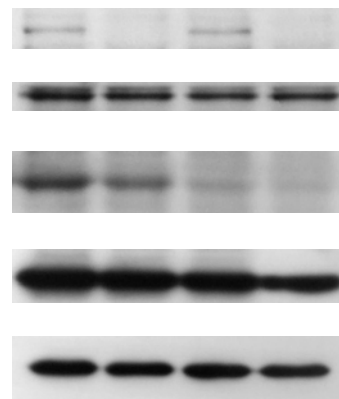

pSTAT5

STAT5

pRPS6

RPS6

GAPDH
